# Supplementary material
Source: publisher site journal article supplement (https://www.dovepress.com/get_supplementary_file.php?f=468484.xlsx)
Supplement: Supplementary file 1 [file get_supplementary_file.php]

## Sheet: Supplemental tables information
Supplemental Tables for Figures Information
Table S1: Receiver operator characteristic(ROC) curve: number of cervical cancer vasculature invasive foci(Fig.3Di)
Table S2: ROC curve: cervical cancer cells number within vasculature invasive foci(Fig.3Dⅱ)
Table S3:The correlation of tumor vasculature invasion and ovorall survival(OS) of cervical cancer patients(Fig.4A).
Table S4: Comparison of the OS and different vasculature invasive locations for patients(Fig.4B).
Table S5: Comparison of the OS and different degree vasculature invasion for patients(Fig.4C).
Table S6:Comparison of the OS for patients and different number of tumor cells/tumor focus(Fig.4D).
Table S7: The count M1 TAMs(CD68PG-M1) in cervical cancer and normal cervix(Fig.5Aⅱ).
Table S8: The count M1 TAMs(CD68kp-1) in cervical cancer and normal cervix(Fig.5Bⅱ).
Table S9: The count of M2 TAMs(CD163) in cervical cancer and normal cervix(Fig.5Cⅱ).
Table S10: The count of M2 TAMs(CD206) in cervical cancer and normal cervix(Fig.5Dⅱ)
Table S11: The count of M2 TAMs and the circulating monocytes(Fig.5Eⅱ-2).
Table S12: The correlation of tumor metastases and M2 TAMs number in cervical cancer ( Fig.5Fⅱ-1).
Table S13:The correlation of tumor metastases and M2/M1 TAMs ratio(Fig.5Fⅱ-2).
Table S14:The OS and MMP2 expression(Fig.5Fⅵ-1).
Table S15:The RFS and MMP2 epression (Fig.5Fⅵ-2).
Table S16: GSM6360680 features for Fig.6,7,8(https://www.ncbi.nlm.nih.gov/gds/?term=GSM6360680)
Table S17: GSM6360680 barcodes for Fig.6,7,8 (https://www.ncbi.nlm.nih.gov/gds/?term=GSM6360680)
Table S18: Branched heatmap showed the differentially genes exprssion (Fig.7Ci)
Table S19: Differentially expressed genes (DEGs) were exhibited with heatmap (Fig.8Bi(Genes))
Table S20 GO analysis were exhibited with heatmap (Fig.8Bi(GO))
Table S21 KEGG analysis were exhibited with heatmap (Fig.8Bi(KEGG))

## Sheet: Table S1
Table S1: Receiver operator characteristic(ROC) curve: number of cervical cancer vasculature invasive foci(Fig.3Di)
Controls	Patients
1	5
2	6
5	4
3	2
1	8
0	4
2	6
3	9
2	5
0	8
2	3
1	9
4	3
2	0
3	2
1	4
6	5
3	2
0	5
2	2
1	3
0	2
2	4
4	0
1	3
2	2
0	3
1	5
1	4
0	6
1	3
1	6
0	5
1	3
2	4
0	5
0	4
1	5
1	4
0	5
1	4
0	1
0	3
1	5
0	3
1	5
0	4
1	3
2	2

## Sheet: Table S2
Table S2: ROC curve: cervical cancer cells number within vasculature invasive foci(Fig.3Dⅱ)
Controls	Patients
1	5
2	6
5	4
3	10
1	8
0	4
2	6
0	9
2	5
0	8
2	3
1	9
0	4
2	7
3	2
1	4
3	5
3	2
0	6
4	2
1	9
1	9
2	4
4	0
1	10
2	2
0	8
1	5
1	4
0	6
1	3
1	6
0	10
1	8
2	4
1	5
0	4
0	6
1	7
0	5
1	4
0	9
5	3
1	5
0	3
1	10
0	4
1	8
2	6

## Sheet: Table S3
Table S3:The correlation of tumor vasculature invasion and ovorall survival(OS) of cervical cancer patients(Fig.4A).
Survival time(months)	Vascular invasion (+)	Vascular invasion (-)
0	0	0
0	1	0
0	0	0
0	1	0
0	1	0
0	1	0
0	0	1
0	0	0
0	1	0
0	1	0
0	0	1
0	0	0
0	1	0
0	1	0
0	1	0
0	0	0

## Sheet: Table S4
Table S4: Comparison of the OS and different vasculature invasive locations for patients(Fig.4B).
months	Intramural and intramural vasculature invasion	Extramural vasculature invasion	Intramural vasculature invasion
0	0	0	0
5	1	0	0
11	0	0	0
15	1	1	0
19	1	0	0
23	1	0	0
29	0	1	0
33	0	1	0
38	1	0	1
41	1	0	0
46	0	1	0
51	1	0	1
53	1	0	0
55	0	1	0
57	0	0	0
59	1	0	0
62	0	0	0

## Sheet: Table S5
Table S5: Comparison of the OS and different degree vasculature invasion for patients(Fig.4C).
Survival time(months)	Extensive invasion	Moderate invasion	Local invasion
0	0	0	0
5	0	0	1
7	1	1	0
9	1	0	0
15	1	0	0
22	0	0	0
26	1	1	0
30	0	1	0
35	1	0	0
40	1	0	1
43	0	1	0
47	0	0	0
51	1	0	0
55	1	1	0
57	0	0	0
59	1	0	0
63	0	0	0

## Sheet: Table S6
Table S6:Comparison of the OS for patients and different number of tumor cells/tumor focus(Fig.4D).
Survival time(months)	The number of tumor cells ≥5	The number of tumor cells < 5.3
0	0	0
6	1	0
11	0	0
15	1	0
19	0	0
23	1	0
29	1	0
33	0	1
37	1	0
42	0	0
47	1	0
51	1	1
53	0	0
56	1	0
59	1	0
61	0	0

## Sheet: Table S7
Table S7: The count M1 TAMs(CD68PG-M1) in cervical cancer and normal cervix(Fig.5Aⅱ).
Tumor	Non_tumor
22	29
27	34
35	37
15	41
19	34

## Sheet: Table S8
Table S8: The count M1 TAMs(CD68kp-1) in cervical cancer and normal cervix(Fig.5Bⅱ).
Tumor	Non_tumor
19	32
23	43
15	21
28	39
45	45

## Sheet: Table S9
Table S9: The count of M2 TAMs(CD163) in cervical cancer and normal cervix(Fig.5Cⅱ).
Tumor	Non_tumor
25	23
34	19
43	17
34	9
26	15

[truncated: 12 more sheets: Table S10, Table S11, Table S12, Table S13, Table S14, Table S15, Table S16, Table S17, Table S18, Table S19, Table S20, Table S21]
